# Supplementary material for: Social Perception of Riparian Forests
Source: MDPI journal article supplement (doi:10.3390/su14159302), 2022-07-29
Supplement: s1 [file s1]

Archive with 1 entries (1 files):
- sustainability-1778164-supplementary.pdf
