# Supplementary material for: Social Perception of Riparian Forests
Source: MDPI journal article supplement (doi:10.3390/su14159302), 2022-07-29
Supplement: s1 [file s1 › sustainability-1778164-supplementary.pdf]

## Survey of rivers and riparian forests

**1. Compared to riparian forests, how often do you visit forests elsewhere - near lakes, the sea, near cities, away from different bodies of water, ect.**

- a. I spend time more often in riparian forests than other forests
- b. I spend time in riparian forests as often as in other forests
- c. I spend less time in riparian forests than in other forests

**2. What do you do in forests away from riparian areas and how often do you visit them during the season (year)?**

|                                                                    | <b>Distance,<br/>km</b> | One or more<br>times a week | Several<br>times per<br>month | Several<br>times per<br>year | Once a<br>year |
|--------------------------------------------------------------------|-------------------------|-----------------------------|-------------------------------|------------------------------|----------------|
| Fishing                                                            |                         |                             |                               |                              |                |
| Hunting                                                            |                         |                             |                               |                              |                |
| Picking<br>berries/mushrooms                                       |                         |                             |                               |                              |                |
| Relaxing or doing<br>sports in <b><u>forest by the<br/>sea</u></b> |                         |                             |                               |                              |                |
| Relaxing or doing<br>sports in <b><u>forest by a<br/>lake</u></b>  |                         |                             |                               |                              |                |

**3. How often do you visit riparian forests and rivers? How far are they from you? What do you do there?**

| Purpose of the trip                                         | How many times a<br>year (season) | Nearest distance,<br>km |
|-------------------------------------------------------------|-----------------------------------|-------------------------|
| Swimming                                                    |                                   |                         |
| Sports (running; orienteering, games, ect..)                |                                   |                         |
| Walking, sightseeing                                        |                                   |                         |
| Relaxing (sunbathing; picnic, ect.)                         |                                   |                         |
| Taking a boat ride                                          |                                   |                         |
| Picking berries/mushrooms/gathering medical<br>plants, ect. |                                   |                         |
| Fishing/hunting                                             |                                   |                         |

**4. Which of the following questions worry you the most? Choose three.**

- a. roads and traffic
- b. education
- c. climate change
- d. forests and water
- e. nacional secuity
- f. health

**5. Please mark to what extent you agree with the mentioned statements about rivers and riparian forests?**

| Statement                                                               | I agree | partly agree | neither agree, nor disagree | partly disagree | I disagree |
|-------------------------------------------------------------------------|---------|--------------|-----------------------------|-----------------|------------|
| 5.1. I care/am concerned about the state of the <b>riparian forests</b> |         |              |                             |                 |            |
| 5.2. I care/am concerned about the state of the <b>rivers</b>           |         |              |                             |                 |            |
| 5.3. I would like to improve the state of the <b>rivers</b>             |         |              |                             |                 |            |
| 5.4. I would like to improve the state of the <b>riparian forests</b>   |         |              |                             |                 |            |

**6. In recent years have you noticed that..**

| Answer                                                                                  | Yes | No |
|-----------------------------------------------------------------------------------------|-----|----|
| 6.1.- The water in rivers has become dirtier and more cloudy                            |     |    |
| 6.2.- The rivers have become shallower                                                  |     |    |
| 6.3.- The river banks are crumbling, the soil is slipping                               |     |    |
| 6.4.- The number of trees fallen into the river has increased                           |     |    |
| 6.5.- There has been a garbage increase in rivers (plastic bottles, ect.)               |     |    |
| 6.6.- Rivers are overgrown with seaweed                                                 |     |    |
| 6.7.- The riparian forests have become more overgrown with many broken and fallen trees |     |    |

**7. Rate the statements below on a 5-point scale (1 - this is not a problem; 5 - this is a significant problem). Mark "0" if you don't know or have no opinion (one answer per line).**

| Statement                                                                       |  | This is not a problem |   |   |   | Significant problem |
|---------------------------------------------------------------------------------|--|-----------------------|---|---|---|---------------------|
|                                                                                 |  | 1                     | 2 | 3 | 4 | 5                   |
| 7a - The visual appeal of riverbanks decreases                                  |  |                       |   |   |   |                     |
| 7b - Water tourism and fishing opportunities decreases                          |  |                       |   |   |   |                     |
| 7c - The economic value of forests decreases because they are not being managed |  |                       |   |   |   |                     |
| 7d - Washouts (soil, clay) enter the rivers and rapids which disappear          |  |                       |   |   |   |                     |
| 7e- Fish movement to spawning grounds is disturbed                              |  |                       |   |   |   |                     |

8. Year of birth \_\_\_\_\_

9. Male \_\_\_\_\_ Female \_\_\_\_\_

10. Level of education?

- a. Basic education
- b. Secondary education
- c. Higher education
